# Supplementary material for: An Engineered M13 Filamentous Nanoparticle as an Antigen Carrier for a Malignant Melanoma Immunotherapeutic Strategy
Source: MDPI journal article supplement (doi:10.3390/v16020232), 2024-02-01
Supplement: s1 [file s1]

Supplementary Materials

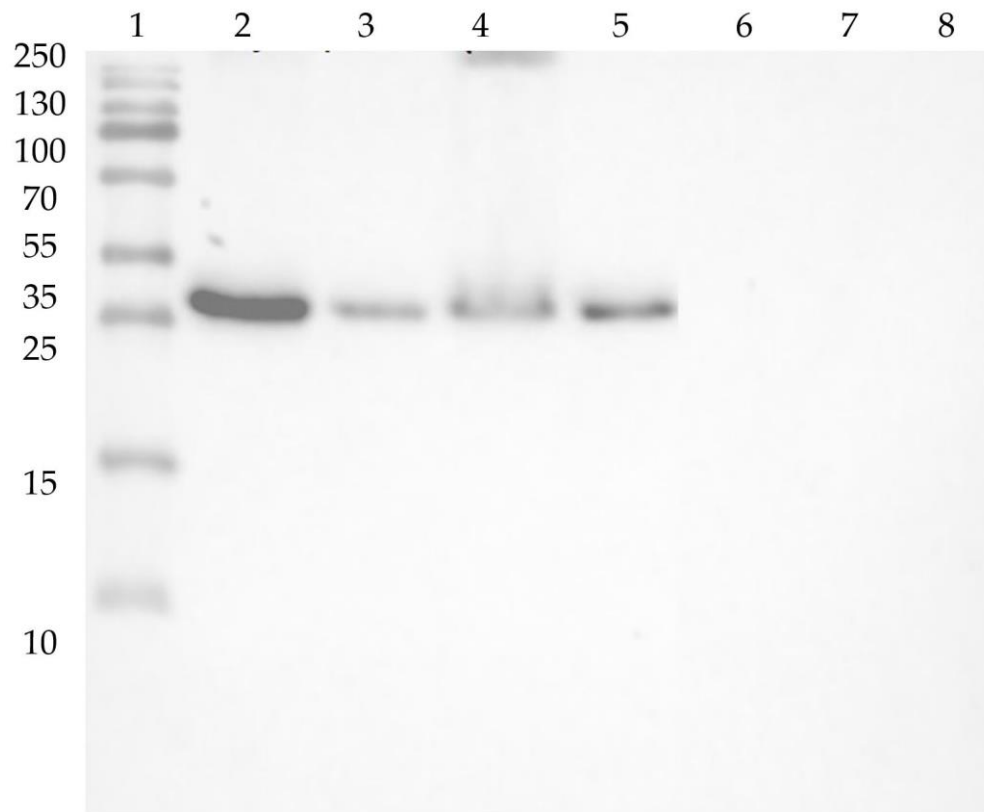

**Figure S1.** Western immunoblotting of fusion protein pIII::MAGE-A1 separated by reducing SDS-PAGE. Lane 1: molecular weight markers in kDa, lines 2-5: fusion protein pIII::MAGE-A1 of genetically engineered bacteriophages, lines 6-8: wild-type pIII of VCSM13 helper bacteriophage.

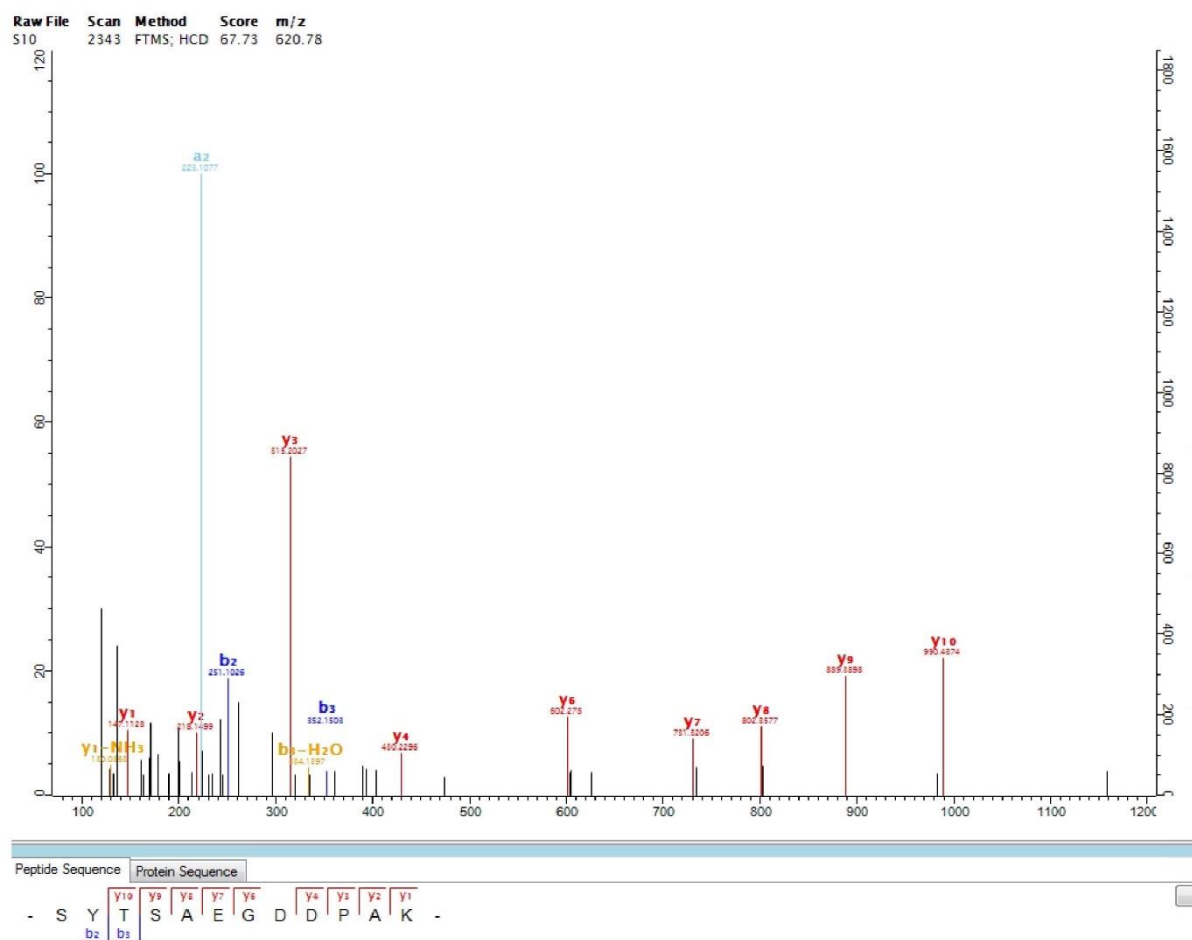

**Figure S2.** MS/MS spectra of the identified peptide SYTSAEGDDPAK by nano LC-MS/MS.
